# Supplementary material for: Shedding light on the physical nature of ion pair interactions involving carba-closo-dodecaborate anions. Insights from computation
Source: Royal Society of Chemistry journal article supplement (doi:10.1039/d2cp04489g), 2023-01-01
Supplement: d2cp04489g1.pdf [file d2cp04489g1.pdf]

Supporting Information:  
Shedding Light on the Physical Nature of Ion  
Pair Interactions Involving  
Carba-*closo*-dodecaborate Anions. Insights  
from Computation

Letícia M. P. Madureira, Luis G. Dias, Renato L. T. Parreira, and Giovanni F.  
Caramori\*

E-mail: giovanni.caramori@ufsc.br

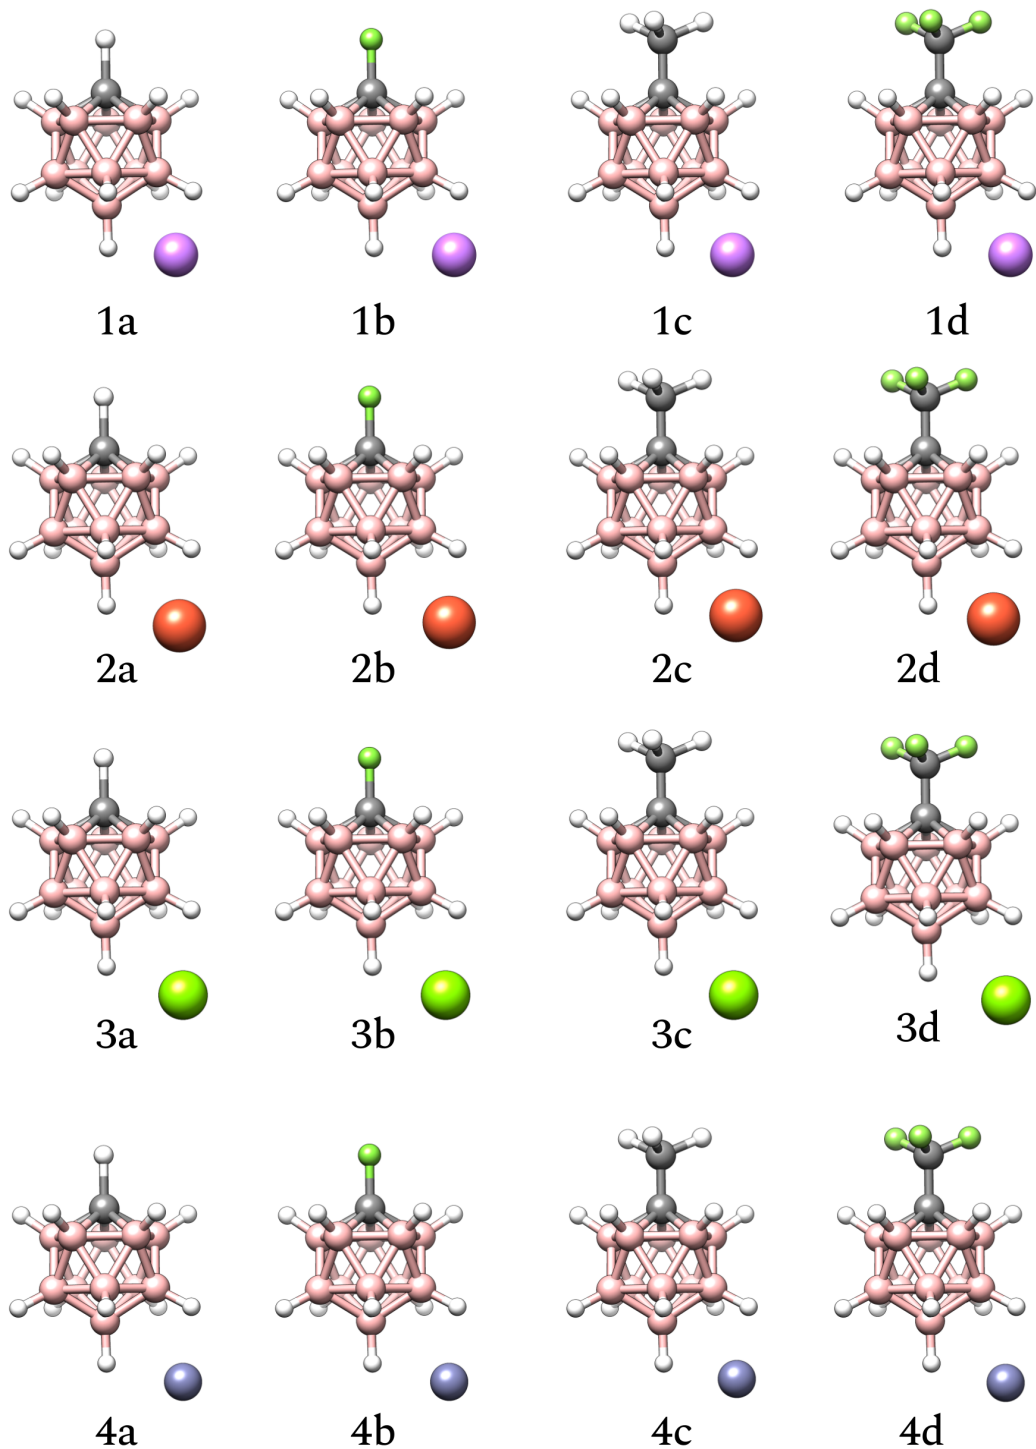

Figure S1: Structures of studied ion pair complexes **1a-4d**,  $R-CB_{11}H_{11}^- \longleftrightarrow M^{q+}$  ( $R = H, F, CH_3, CF_3$  and  $M^{q+} = Li^+, Na^+, Mg^{2+}, Zn^{2+}$  in which the different R are represented by letters **a-d**, while the metallic cations  $M^{q+}$  are denoted by the numbers **1-4**, respectively.

Table S1: Relative energies of the optimized structures ( $\Delta E^{opt}$ ) reported in kcal · mol<sup>-1</sup> to evaluate the most stable coordination position (CP). As a reference, the coordinate structure at position 4, which has the lowest associated energies, is used.

| M                | CP | Relative energies ( $\Delta E^{opt}$ / (kcal · mol <sup>-1</sup> )) |               |               |               |
|------------------|----|---------------------------------------------------------------------|---------------|---------------|---------------|
|                  |    | ( <b>1a</b> )                                                       | ( <b>1b</b> ) | ( <b>1c</b> ) | ( <b>1d</b> ) |
| Li <sup>+</sup>  | 1  | 40.74                                                               | 21.32         | 38.40         | 30.68         |
|                  | 2  | 20.09                                                               | 10.43         | 23.84         | 8.76          |
|                  | 3  | 6.56                                                                | 3.52          | 4.01          | 2.08          |
|                  | 4  | 0.00                                                                | 0.00          | 0.00          | 0.00          |
|                  | 5  | 25.07                                                               | 12.22         | 32.05         | 19.04         |
| Na <sup>+</sup>  | 1  | 25.25                                                               | 0.675         | 17.67         | 20.02         |
|                  | 2  | 1.02                                                                | 0.900         | 0.982         | 1.01          |
|                  | 3  | 8.98                                                                | 10.84         | 11.66         | 9.76          |
|                  | 4  | 0.00                                                                | 0.00          | 0.00          | 0.00          |
|                  | 5  | 39.77                                                               | 15.49         | 29.43         | 32.16         |
| Mg <sup>+2</sup> | 1  | 58.31                                                               | 44.18         | 50.50         | 52.63         |
|                  | 2  | 28.15                                                               | 29.99         | 27.68         | 25.51         |
|                  | 3  | 13.07                                                               | 10.46         | 9.65          | 12.03         |
|                  | 4  | 0.00                                                                | 0.00          | 0.00          | 0.00          |
|                  | 5  | 36.22                                                               | 30.81         | 35.76         | 38.78         |
| Zn <sup>+2</sup> | 1  | 54.89                                                               | 60.12         | 59.77         | 58.11         |
|                  | 2  | 35.02                                                               | 30.75         | 26.10         | 28.45         |
|                  | 3  | 5.06                                                                | 6.97          | 3.84          | 4.84          |
|                  | 4  | 0.00                                                                | 0.00          | 0.00          | 0.00          |
|                  | 5  | 37.03                                                               | 26.56         | 28.94         | 30.89         |

Table S2: Results of Energy Decomposition Analyses of closocarborane (**1a - 4a**), substituted with hydrogen at the apical position. The numbers in the C.P. column. (*cationic position*) indicate the position of the cations in the geometry of the complex.

| (1a) |                  |                  |                   |                  |                     |                  |                   |                    |
|------|------------------|------------------|-------------------|------------------|---------------------|------------------|-------------------|--------------------|
| C.P. | M                | $\Delta E^{tot}$ | $\Delta E^{prep}$ | $\Delta E^{int}$ | $\Delta E^{elstat}$ | $\Delta E^{orb}$ | $\Delta E^{disp}$ | $\Delta E^{Pauli}$ |
| 1    | Li <sup>+</sup>  | -60.40           | 8.91              | -69.31           | -53.47              | -20.26           | -0.64             | 5.06               |
|      | Na <sup>+</sup>  | -52.37           | 10.1              | -62.49           | -50.81              | -13.49           | -0.54             | 2.34               |
|      | Mg <sup>+2</sup> | -179.19          | 6.78              | -185.97          | -100.77             | -85.85           | -1.61             | 2.26               |
|      | Zn <sup>+2</sup> | -249.27          | 6.89              | -256.16          | -101.97             | -154.50          | -1.59             | 1.91               |
| 2    | Li <sup>+</sup>  | -88.75           | 5.65              | -94.40           | -80.01              | -20.22           | -1.18             | 7.06               |
|      | Na <sup>+</sup>  | -76.03           | 6.81              | -82.84           | -84.43              | -15.70           | -0.84             | 18.14              |
|      | Mg <sup>+2</sup> | -220.82          | 8.68              | -229.50          | -162.12             | -82.42           | -2.39             | 17.43              |
|      | Zn <sup>+2</sup> | -275.99          | 8.31              | -284.30          | -171.04             | -131.27          | -2.27             | 20.25              |
| 3    | Li <sup>+</sup>  | -106.98          | 6.13              | -113.11          | -95.29              | -42.50           | -1.56             | 25.02              |
|      | Na <sup>+</sup>  | -65.29           | 5.88              | -71.17           | -113.32             | -34.14           | -0.85             | 77.35              |
|      | Mg <sup>+2</sup> | -275.39          | 8.13              | -283.52          | -198.83             | -152.23          | -2.26             | 71.50              |
|      | Zn <sup>+2</sup> | -336.47          | 8.19              | -344.66          | -237.72             | -199.07          | -2.64             | 94.73              |
| 4    | Li <sup>+</sup>  | -117.09          | 5.46              | -122.55          | -101.75             | -39.01           | -1.59             | 20.60              |
|      | Na <sup>+</sup>  | -79.87           | 7.65              | -87.52           | -115.77             | -31.85           | -0.75             | 61.22              |
|      | Mg <sup>+2</sup> | -295.00          | 7.51              | -302.51          | -209.88             | -145.05          | -2.24             | 57.01              |
|      | Zn <sup>+2</sup> | -351.92          | 8.43              | -360.35          | -240.87             | -191.92          | -2.58             | 72.09              |
| 5    | Li <sup>+</sup>  | -77.45           | 6.71              | -84.16           | -85.21              | -37.79           | -1.47             | 40.31              |
|      | Na <sup>+</sup>  | -26.94           | 4.13              | -31.07           | -112.33             | -28.02           | -0.55             | 109.83             |
|      | Mg <sup>+2</sup> | -203.76          | 6.77              | -210.53          | -183.69             | -126.18          | -2.41             | 101.75             |
|      | Zn <sup>+2</sup> | -266.79          | 8.52              | -275.31          | -235.24             | -175.61          | -2.87             | 138.45             |

Table S3: Results of Energy Decomposition Analyses of closocarborane (**1b-4b**), substituted with hydrogen at the apical position. The numbers in the C.P. column. (*cationic position*) indicate the position of the cations in the geometry of the complex.

| (1b) |                  |                  |                   |                  |                     |                  |                   |                    |
|------|------------------|------------------|-------------------|------------------|---------------------|------------------|-------------------|--------------------|
| C.P. | M                | $\Delta E^{tot}$ | $\Delta E^{prep}$ | $\Delta E^{int}$ | $\Delta E^{elstat}$ | $\Delta E^{orb}$ | $\Delta E^{disp}$ | $\Delta E^{Pauli}$ |
| 1    | Li <sup>+</sup>  | -75.54           | 9.11              | -84.65           | -72.48              | -12.80           | -0.76             | 1.39               |
|      | Na <sup>+</sup>  | -73.11           | 8.23              | -81.34           | -73.48              | -11.70           | -0.84             | 4.77               |
|      | Mg <sup>+2</sup> | -190.54          | 5.56              | -196.19          | -145.36             | -53.49           | -0.91             | 4.16               |
|      | Zn <sup>+2</sup> | -236.98          | 7.19              | -244.17          | -148.31             | -100.40          | -1.47             | 6.05               |
| 2    | Li <sup>+</sup>  | -84.93           | 5.48              | -90.41           | -76.08              | -20.03           | -1.16             | 6.88               |
|      | Na <sup>+</sup>  | -71.86           | 7.15              | -79.01           | -80.39              | -15.55           | -0.81             | 17.76              |
|      | Mg <sup>+2</sup> | -211.23          | 9.12              | -220.35          | -154.20             | -80.80           | -2.39             | 17.03              |
|      | Zn <sup>+2</sup> | -260.45          | 8.97              | -269.42          | -166.71             | -124.06          | -2.24             | 19.78              |
| 3    | Li <sup>+</sup>  | -101.00          | 6.78              | -107.78          | -90.00              | -42.15           | -1.55             | 25.93              |
|      | Na <sup>+</sup>  | -61.91           | 4.21              | -66.12           | -107.83             | -33.91           | -0.85             | 76.42              |
|      | Mg <sup>+2</sup> | -263.28          | 9.02              | -272.30          | -188.15             | -11.69           | -2.25             | 69.79              |
|      | Zn <sup>+2</sup> | -321.86          | 10.87             | -332.73          | -226.63             | -197.92          | -2.64             | 93.85              |
| 4    | Li <sup>+</sup>  | -110.45          | 6.79              | -117.24          | -96.67              | -39.44           | -1.59             | 20.46              |
|      | Na <sup>+</sup>  | -75.17           | 7.22              | -82.39           | -110.57             | -31.96           | -0.75             | 60.89              |
|      | Mg <sup>+2</sup> | -283.21          | 8.12              | -291.33          | -199.61             | -159.61          | -2.10             | 55.72              |
|      | Zn <sup>+2</sup> | -339.65          | 9.03              | -348.68          | -230.43             | -198.75          | -2.57             | 72.72              |
| 5    | Li <sup>+</sup>  | -81.86           | 5.67              | -87.53           | -88.63              | -36.87           | -1.62             | 39.59              |
|      | Na <sup>+</sup>  | -30.25           | 5.55              | -35.80           | -115.20             | -27.96           | -0.95             | 108.31             |
|      | Mg <sup>+2</sup> | -208.65          | 7.43              | -216.08          | -190.22             | -123.52          | -2.36             | 100.01             |
|      | Zn <sup>+2</sup> | -268.26          | 8.01              | -276.2           | -241.18             | -169.69          | -2.65             | 137.25             |

Table S4: Results of Energy Decomposition Analyses of closocarborane (**1c-4c**), substituted with hydrogen at the apical position. The numbers in the column C.P. (cationic position) indicate the position of the cations in the geometry of the complex.

| (1c) |                  |                  |                   |                  |                     |                  |                   |                    |
|------|------------------|------------------|-------------------|------------------|---------------------|------------------|-------------------|--------------------|
| C.P. | M                | $\Delta E^{tot}$ | $\Delta E^{prep}$ | $\Delta E^{int}$ | $\Delta E^{elstat}$ | $\Delta E^{orb}$ | $\Delta E^{disp}$ | $\Delta E^{Pauli}$ |
| 1    | Li <sup>+</sup>  | -61.43           | 7.88              | -69.31           | -53.47              | -20.03           | -1.16             | 6.88               |
|      | Na <sup>+</sup>  | -48.59           | 9.11              | -57.70           | -56.97              | -16.76           | -0.74             | 16.78              |
|      | Mg <sup>+2</sup> | -167.81          | 9.23              | -177.04          | -108.40             | -82.37           | -1.12             | 14.85              |
|      | Zn <sup>+2</sup> | -226.98          | 8.25              | -235.23          | -117.02             | -136.87          | -1.21             | 19.87              |
| 2    | Li <sup>+</sup>  | -89.51           | 6.12              | -95.63           | -81.19              | -20.36           | -1.19             | 7.12               |
|      | Na <sup>+</sup>  | -78.04           | 5.99              | -84.03           | -85.65              | -15.78           | -0.85             | 18.25              |
|      | Mg <sup>+2</sup> | -223.85          | 8.22              | -232.07          | -164.50             | -82.72           | -2.40             | 17.54              |
|      | Zn <sup>+2</sup> | -277.94          | 7.83              | -285.77          | -173.49             | -130.42          | -2.25             | 20.39              |
| 3    | Li <sup>+</sup>  | -106.93          | 7.16              | -114.09          | -95.95              | -42.74           | -1.62             | 26.22              |
|      | Na <sup>+</sup>  | -64.67           | 7.48              | -72.15           | -113.95             | -34.34           | -0.96             | 77.10              |
|      | Mg <sup>+2</sup> | -276.06          | 9.80              | -285.87          | -200.13             | -153.82          | -2.37             | 70.45              |
|      | Zn <sup>+2</sup> | -338.30          | 8.97              | -347.27          | -238.97             | -200.18          | -2.75             | 94.62              |
| 4    | Li <sup>+</sup>  | -116.50          | 7.40              | -124.13          | -103.31             | -39.92           | -1.61             | 20.72              |
|      | Na <sup>+</sup>  | -82.33           | 6.68              | -89.01           | -117.39             | -32.33           | -0.77             | 61.48              |
|      | Mg <sup>+2</sup> | -299.22          | 6.71              | -305.93          | -213.00             | -147.00          | -2.26             | 56.33              |
|      | Zn <sup>+2</sup> | -355.04          | 7.13              | -362.17          | -244.14             | -190.84          | -2.59             | 73.41              |
| 5    | Li <sup>+</sup>  | -77.38           | 5.09              | -82.47           | -83.30              | -41.00           | -1.57             | 43.40              |
|      | Na <sup>+</sup>  | -22.58           | 4.15              | -26.73           | -112.43             | -31.28           | -0.91             | 117.88             |
|      | Mg <sup>+2</sup> | -204.96          | 6.78              | -211.74          | -180.78             | -137.54          | -2.65             | 109.24             |
|      | Zn <sup>+2</sup> | -269.20          | 7.81              | -277.01          | -237.05             | -186.84          | -3.02             | 149.90             |

Table S5: Results of Energy Decomposition Analyses of closocarborane (**1d-4d**), substituted with hydrogen at the apical position. The numbers in the column C.P. (cationic position) indicate the position of the cations in the geometry of the complex.

| (1d) |                  |                  |                   |                  |                     |                  |                   |                    |
|------|------------------|------------------|-------------------|------------------|---------------------|------------------|-------------------|--------------------|
| C.P. | M                | $\Delta E^{tot}$ | $\Delta E^{prep}$ | $\Delta E^{int}$ | $\Delta E^{elstat}$ | $\Delta E^{orb}$ | $\Delta E^{disp}$ | $\Delta E^{Pauli}$ |
| 1    | Li <sup>+</sup>  | -56.83           | 7.99              | -64.82           | -51.04              | -21.36           | -0.77             | 8.40               |
|      | Na <sup>+</sup>  | -38.34           | 9.18              | -47.52           | -57.41              | -18.28           | -0.90             | 29.06              |
|      | Mg <sup>+2</sup> | -156.22          | 8.54              | -164.76          | -104.68             | -83.60           | -1.03             | 24.55              |
|      | Zn <sup>+2</sup> | -202.69          | 7.98              | -210.67          | -122.18             | -131.21          | -1.06             | 43.78              |
| 2    | Li <sup>+</sup>  | -88.64           | 5.42              | -94.06           | -79.58              | -20.33           | -1.19             | 7.04               |
|      | Na <sup>+</sup>  | -76.23           | 6.23              | -82.52           | -83.99              | -15.78           | -0.85             | 18.10              |
|      | Mg <sup>+2</sup> | -221.86          | 6.79              | -228.65          | -161.25             | -82.39           | -2.40             | 17.39              |
|      | Zn <sup>+2</sup> | -273.77          | 8.91              | -282.68          | -170.16             | -130.48          | -2.25             | 20.21              |
| 3    | Li <sup>+</sup>  | -105.23          | 6.71              | -111.94          | -93.69              | -42.66           | -1.64             | 26.05              |
|      | Na <sup>+</sup>  | -64.93           | 5.23              | -70.16           | -111.58             | -34.31           | -0.99             | 76.72              |
|      | Mg <sup>+2</sup> | -272.33          | 8.99              | -281.32          | -195.56             | -153.42          | -2.39             | 70.05              |
|      | Zn <sup>+2</sup> | -333.36          | 9.01              | -342.37          | -234.18             | -199.54          | -2.78             | 94.13              |
| 4    | Li <sup>+</sup>  | -114.43          | 7.48              | -121.91          | -101.08             | -39.83           | -1.61             | 20.61              |
|      | Na <sup>+</sup>  | -79.66           | 7.23              | -86.89           | -115.08             | -32.27           | -0.77             | 61.24              |
|      | Mg <sup>+2</sup> | -293.02          | 8.14              | -301.16          | -208.49             | -146.48          | -2.27             | 56.08              |
|      | Zn <sup>+2</sup> | -350.52          | 8.45              | -358.97          | -239.49             | -189.99          | -2.60             | 73.12              |
| 5    | Li <sup>+</sup>  | -73.78           | 4.07              | -77.85           | -78.68              | -41.69           | -1.79             | 44.31              |
|      | Na <sup>+</sup>  | -14.41           | 4.98              | -19.40           | -108.68             | -31.98           | -1.22             | 122.47             |
|      | Mg <sup>+2</sup> | -194.67          | 5.67              | -200.34          | -171.83             | -138.57          | -2.52             | 112.58             |
|      | Zn <sup>+2</sup> | -255.97          | 8.19              | -264.16          | -231.38             | -186.47          | -2.85             | 158.54             |

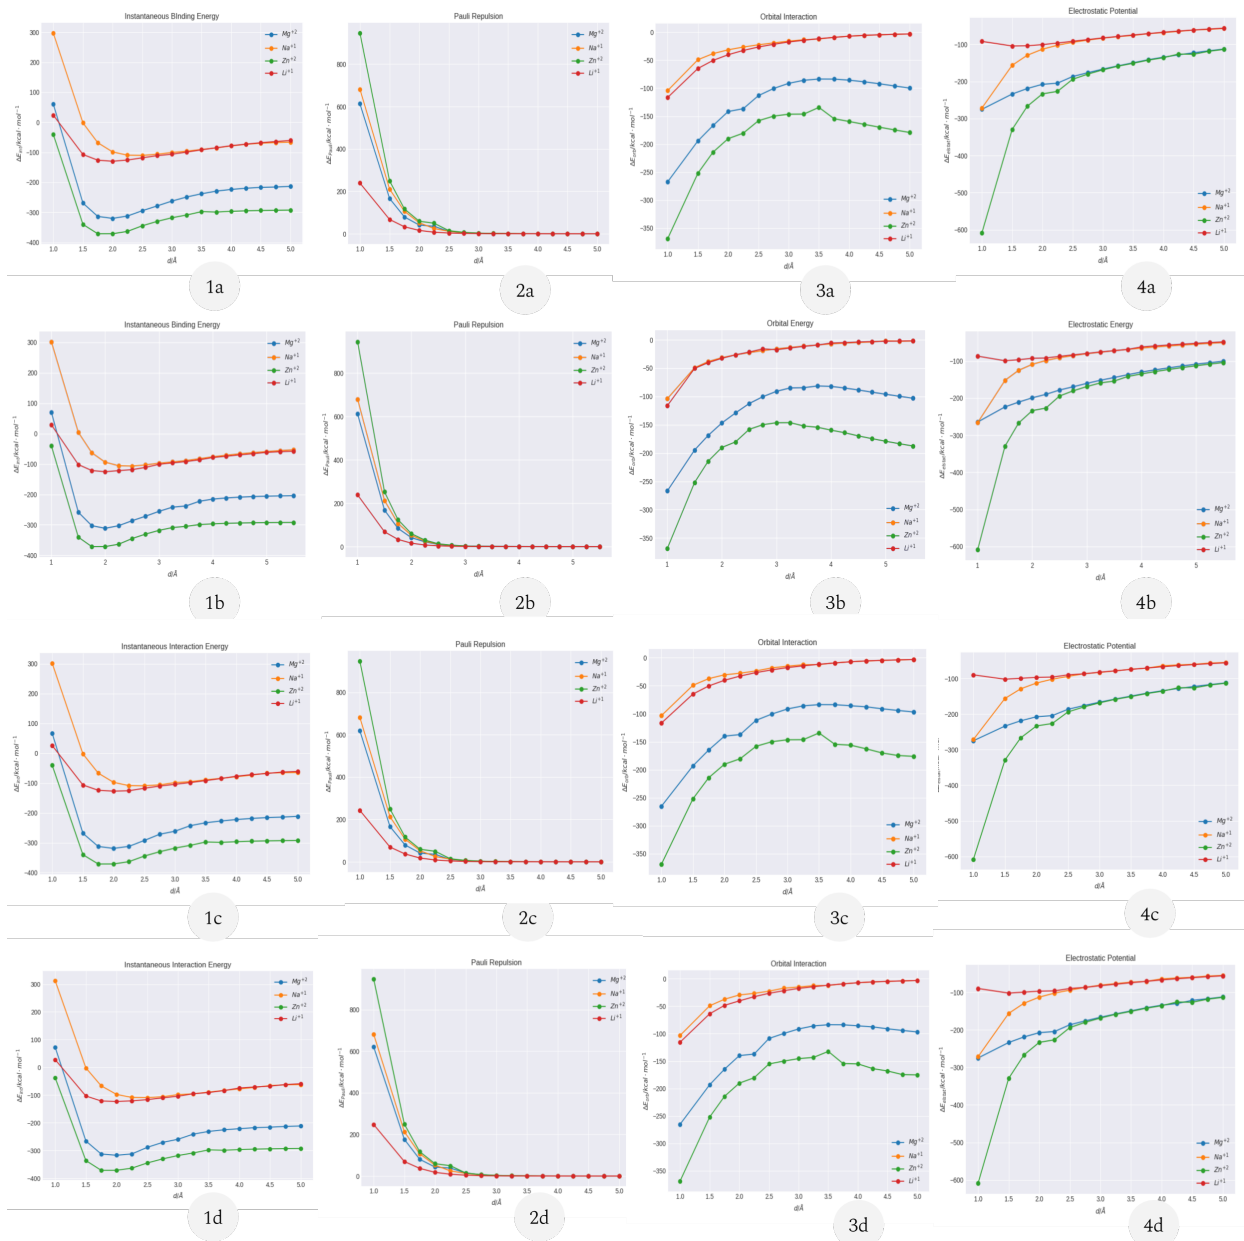

Figure S2: Graphs of the rigid molecular scans. The labels on the graphs correspond to the plotted EDA terms. The **1a-1d** plots refer to the  $\Delta E^{int}$  values for the anions substituted, respectively, by:  $H, F, CH_3, CF_3$ . The **2a-2d** plots follow the same order of anionic substitution, representing Pauli repulsion ( $\Delta E^{Pauli}$ ). The **3a-3d** plots follow the same order of anionic substitution, representing the orbital interaction ( $\Delta E^{orb}$ ). The **4a-4d** graphs follow the same order of anionic substitution, representing the electrostatic interaction ( $\Delta E^{elstat}$ ).



Table S6: Charge Transfer Integrals calculations results, following the numbering scheme of figure 2.

| M                | HOMO(Fragment 1) $\rightarrow$ LUMO(Fragment 2) |         |        |         | LUMO(Fragment 1) $\rightarrow$ HOMO(Fragment 2) |         |         |        |        |         |         |
|------------------|-------------------------------------------------|---------|--------|---------|-------------------------------------------------|---------|---------|--------|--------|---------|---------|
|                  | e1/(eV)                                         | e2/(eV) | S      | J/(eV)  | V/(eV)                                          | e1/(eV) | e2/(eV) | S      | J/(eV) | V/(eV)  |         |
| Li <sup>+</sup>  | 1a                                              | -54.62  | -1.170 | -0.008  | 0.451                                           | 0.216   | -4.100  | -8.020 | -0.040 | -0.4179 | 0.1770  |
|                  | 1b                                              | -52.11  | -1.138 | -0.006  | 0.412                                           | 0.201   | -4.001  | -8.008 | -0.030 | -0.4007 | 0.1601  |
|                  | 1c                                              | -47.07  | -0.917 | -0.007  | 0.438                                           | 0.188   | -4.077  | -7.815 | -0.022 | -0.360  | -0.1489 |
|                  | 1d                                              | -48.99  | -0.877 | -0.011  | 0.455                                           | 0.193   | -4.153  | -7.926 | -0.027 | -0.343  | -0.142  |
| Na <sup>+</sup>  | 1a                                              | -31.80  | -1.152 | -0.001  | 0.009                                           | 0.005   | -3.977  | -7.992 | -0.426 | -0.042  | -0.179  |
|                  | 1b                                              | -29.86  | -1.148 | 0       | 0.007                                           | 0.003   | -3.702  | -7.788 | -0.395 | -0.033  | -0.1602 |
|                  | 1c                                              | -36.06  | -1.216 | -0.0047 | 0.012                                           | 0.0064  | -4.167  | -8.204 | -0.552 | -0.061  | -0.222  |
|                  | 1d                                              | -32.04  | -1.199 | -0.003  | 0.008                                           | 0.008   | -4.014  | -8.001 | -0.473 | -0.056  | -0.194  |
| Mg <sup>+2</sup> | 1a                                              | -7.671  | -1.494 | -0.054  | 0.421                                           | 0.173   | -4.145  | -8.424 | 0.040  | -0.466  | -0.215  |
|                  | 1b                                              | -7.589  | -1.432 | -0.045  | 0.388                                           | 0.162   | -4.076  | -8.403 | 0.039  | -0.459  | -0.201  |
|                  | 1c                                              | -7.412  | -1.377 | -0.038  | 0.400                                           | 0.177   | -4.113  | -8.255 | 0.032  | -0.440  | -0.171  |
|                  | 1d                                              | -7.625  | -1.521 | -0.053  | 0.350                                           | 0.129   | -4.094  | -8.547 | 0.0297 | -0.418  | -0.188  |
| Zn <sup>+2</sup> | 1a                                              | -8.678  | -1.836 | -0.046  | 0.423                                           | 0.178   | -2.894  | -8.741 | -0.034 | 0.411   | 0.211   |
|                  | 1b                                              | -8.501  | -1.789 | -0.045  | 0.599                                           | 0.181   | -2.520  | -8.312 | -0.020 | 0.509   | 0.379   |
|                  | 1c                                              | -8.101  | -1.068 | -0.024  | 0.822                                           | 0.235   | -2.929  | -8.784 | -0.079 | 0.896   | 0.555   |
|                  | 1d                                              | -8.998  | -1.820 | -0.017  | 0.733                                           | 0.302   | -3.001  | -9.007 | -0.101 | 0.708   | 0.312   |

Table S7: Cartesian coordinates of complex (**1a**)

C 2.352162390 8.107331315 13.247610618 B 4.789502499 7.205244081 14.151662747 H 5.448506089 6.398

Table S8: Cartesian coordinates of complex (**2a**)

|    |             |              |              |
|----|-------------|--------------|--------------|
| C  | 2.343567982 | 8.098992583  | 13.252900281 |
| B  | 4.782596273 | 7.199442840  | 14.154925671 |
| H  | 5.441774967 | 6.391175467  | 14.714170127 |
| B  | 3.237525215 | 7.928674780  | 11.815090051 |
| H  | 2.695956168 | 7.619546569  | 10.811529574 |
| B  | 2.866419215 | 9.346587302  | 14.289703623 |
| H  | 2.073730831 | 9.969652921  | 14.906137353 |
| B  | 3.378986117 | 6.747981785  | 13.157674928 |
| H  | 2.923885532 | 5.667252676  | 13.019317731 |
| B  | 2.923219064 | 9.527832147  | 12.524752710 |
| H  | 2.169656282 | 10.266678641 | 11.990480154 |
| B  | 4.554929289 | 9.119440984  | 11.964688222 |
| H  | 5.047842976 | 9.643075979  | 11.002805736 |
| B  | 4.456430732 | 8.820243961  | 14.854846465 |
| H  | 4.876577978 | 9.144715701  | 15.914188799 |
| B  | 4.319355192 | 9.998496863  | 13.511838119 |
| H  | 4.632582615 | 11.151310381 | 13.638943996 |
| B  | 3.149604079 | 7.628600475  | 14.678279435 |
| H  | 2.532882275 | 7.135896984  | 15.557420095 |
| B  | 4.823853464 | 7.395540262  | 12.372907746 |
| B  | 5.488638671 | 8.663552715  | 13.418448776 |
| H  | 6.676843093 | 8.862172140  | 13.477691720 |
| H  | 5.517461783 | 6.718243114  | 11.689855773 |
| H  | 1.280875622 | 7.924437243  | 13.199023291 |
| Na | 6.497321863 | 10.766226001 | 12.367179324 |

Table S9: Cartesian coordinates of complex (**3a**)

|    |             |              |              |
|----|-------------|--------------|--------------|
| C  | 2.343129560 | 8.099687677  | 13.250643508 |
| B  | 4.780282873 | 7.197303342  | 14.154902672 |
| H  | 5.456710119 | 6.406130355  | 14.706602302 |
| B  | 3.238904486 | 7.930408486  | 11.813842235 |
| H  | 2.721063093 | 7.639542990  | 10.798717730 |
| B  | 2.865485778 | 9.345682429  | 14.289618156 |
| H  | 2.093685547 | 9.988404170  | 14.902140243 |
| B  | 3.377693697 | 6.748036241  | 13.155227604 |
| H  | 2.939102132 | 5.667761776  | 13.007049107 |
| B  | 2.924801631 | 9.528959421  | 12.524959880 |
| H  | 2.199469922 | 10.284336599 | 11.986083483 |
| B  | 4.556969829 | 9.120038776  | 11.966619105 |
| H  | 5.105425229 | 9.688357021  | 11.020267104 |
| B  | 4.454349573 | 8.817518029  | 14.856287884 |
| H  | 4.886521254 | 9.154596756  | 15.901182984 |
| B  | 4.319944499 | 9.997447536  | 13.514482128 |
| H  | 4.697179019 | 11.167611646 | 13.610146594 |
| B  | 3.146897336 | 7.627034527  | 14.676555500 |
| H  | 2.543565203 | 7.143068884  | 15.562264445 |
| B  | 4.824089909 | 7.395464248  | 12.373173906 |
| B  | 5.488382985 | 8.661763088  | 13.421101844 |
| H  | 6.705176994 | 8.921098755  | 13.450645073 |
| H  | 5.529004630 | 6.739873629  | 11.688807498 |
| H  | 1.278557263 | 7.936370577  | 13.188158901 |
| Mg | 6.216124717 | 10.529273554 | 12.465319815 |

Table S10: Cartesian coordinates of complex (**4a**)

|    |             |              |              |
|----|-------------|--------------|--------------|
| C  | 2.345223726 | 8.102753909  | 13.248903143 |
| B  | 4.782596818 | 7.200769408  | 14.152968885 |
| H  | 5.456863085 | 6.408756671  | 14.704684829 |
| B  | 3.240997133 | 7.933873978  | 11.812053964 |
| H  | 2.723817875 | 7.639998242  | 10.798207337 |
| B  | 2.867337240 | 9.348713772  | 14.288041585 |
| H  | 2.095835198 | 9.988197775  | 14.903135543 |
| B  | 3.380078547 | 6.751340582  | 13.153267010 |
| H  | 2.947616486 | 5.669727551  | 13.000119021 |
| B  | 2.926566409 | 9.532255246  | 12.523407895 |
| H  | 2.201797814 | 10.287245969 | 11.984865336 |
| B  | 4.558808494 | 9.123768325  | 11.964965445 |
| H  | 5.101197264 | 9.672797186  | 10.993626573 |
| B  | 4.456330652 | 8.820813306  | 14.854593793 |
| H  | 4.884237376 | 9.156118420  | 15.901061174 |
| B  | 4.321633910 | 10.000904936 | 13.512959877 |
| H  | 4.685673734 | 11.181350438 | 13.635978525 |
| B  | 3.149131946 | 7.630071816  | 14.674726367 |
| H  | 2.550565294 | 7.150375971  | 15.565418074 |
| B  | 4.826313511 | 7.399193883  | 12.371267224 |
| B  | 5.490359690 | 8.665487377  | 13.419358100 |
| H  | 6.728608517 | 8.921692669  | 13.456296047 |
| H  | 5.527146793 | 6.740734223  | 11.686584767 |
| H  | 1.280212301 | 7.940070548  | 13.185862171 |
| Zn | 6.163567466 | 10.468758313 | 12.492447014 |

Table S11: Cartesian coordinates of complex (**1b**)

|    |             |             |              |
|----|-------------|-------------|--------------|
| C  | 2.368694432 | 8.109789559 | 13.249119943 |
| B  | 4.806582035 | 7.208597142 | 14.152588087 |
| H  | 5.459775027 | 6.398290986 | 14.711944811 |
| B  | 3.263933194 | 7.940494043 | 11.811986462 |
| H  | 2.708080429 | 7.633800102 | 10.818753186 |
| B  | 2.890995663 | 9.356256689 | 14.287555484 |
| H  | 2.085685484 | 9.968260174 | 14.893583495 |
| B  | 3.403750698 | 6.758521098 | 13.153616929 |
| H  | 2.931959679 | 5.687823292 | 13.014311869 |
| B  | 2.949499121 | 9.539103771 | 12.522825493 |
| H  | 2.184811991 | 0.265537547 | 11.993790127 |
| B  | 4.581593899 | 9.130682385 | 11.963904954 |
| H  | 5.100015540 | 9.681141529 | 11.028796888 |
| B  | 4.480304900 | 8.828863467 | 14.853694087 |
| H  | 4.894334366 | 9.153423414 | 15.913032653 |
| B  | 4.344872320 | 0.008395289 | 13.511642022 |
| H  | 4.694649776 | 1.155467190 | 13.612663250 |
| B  | 3.173246337 | 7.637819160 | 14.674815852 |
| H  | 2.540779679 | 7.147327016 | 15.540483742 |
| B  | 4.849563658 | 7.406317648 | 12.370790294 |
| B  | 5.513797482 | 8.673147049 | 13.418114361 |
| H  | 6.696205714 | 8.916847876 | 13.449968181 |
| H  | 5.538718310 | 6.729487149 | 11.685980655 |
| F  | 1.008964872 | 7.886362048 | 13.174182218 |
| Li | 6.221702675 | 0.514014890 | 12.476654658 |

Table S12: Cartesian coordinates of complex (**2b**)

|    |             |              |              |
|----|-------------|--------------|--------------|
| C  | 2.360102543 | 8.100951638  | 13.254925533 |
| B  | 4.800125206 | 7.203137513  | 14.155990293 |
| H  | 5.454188938 | 6.392395023  | 14.715822126 |
| B  | 3.253308659 | 7.930356286  | 11.816681456 |
| H  | 2.692322321 | 7.619002585  | 10.826692623 |
| B  | 2.882909334 | 9.349353793  | 14.290778953 |
| H  | 2.074411873 | 9.958011183  | 14.897655081 |
| B  | 3.396168283 | 6.750430867  | 13.159792913 |
| H  | 2.922222776 | 5.679679948  | 13.021344245 |
| B  | 2.938584222 | 9.529716322  | 12.525701810 |
| H  | 2.168449673 | 10.252753805 | 11.997717585 |
| B  | 4.570179564 | 9.121885115  | 11.964895166 |
| H  | 5.058938124 | 9.645325064  | 11.001933363 |
| B  | 4.473524439 | 8.824130056  | 14.855264540 |
| H  | 4.888153802 | 9.148248221  | 15.915863469 |
| B  | 4.335051191 | 10.001617467 | 13.511728316 |
| H  | 4.642108926 | 11.155106772 | 13.638995890 |
| B  | 3.167215625 | 7.631715553  | 14.680076262 |
| H  | 2.533701899 | 7.142077997  | 15.546593233 |
| B  | 4.840239744 | 7.398335691  | 12.373847559 |
| B  | 5.504974930 | 8.667233948  | 13.418345205 |
| H  | 6.691555656 | 8.863416795  | 13.478485478 |
| H  | 5.528101698 | 6.718112396  | 11.689347395 |
| F  | 1.000452652 | 7.876256898  | 13.182369060 |
| Na | 6.515525200 | 10.776519578 | 12.363952148 |

Table S13: Cartesian coordinates of complex (**3b**)

|    |             |              |              |
|----|-------------|--------------|--------------|
| C  | 2.359727436 | 8.102904152  | 13.251702234 |
| B  | 4.797333089 | 7.201265393  | 14.155485728 |
| H  | 5.467945621 | 6.406578870  | 14.708288077 |
| B  | 3.255169761 | 7.933589563  | 11.814697818 |
| H  | 2.717851635 | 7.640437341  | 10.811456745 |
| B  | 2.882053243 | 9.349206461  | 14.290323234 |
| H  | 2.093650594 | 9.978235569  | 14.894250325 |
| B  | 3.394592538 | 6.751485429  | 13.156253777 |
| H  | 2.937708699 | 5.679759354  | 13.007150103 |
| B  | 2.940866365 | 9.532189110  | 12.525617583 |
| H  | 2.199353226 | 10.273749046 | 11.991948899 |
| B  | 4.572987937 | 9.123564204  | 11.966924148 |
| H  | 5.115059048 | 9.692059575  | 11.018805074 |
| B  | 4.471191504 | 8.821524125  | 14.856672344 |
| H  | 4.897278973 | 9.157513514  | 15.903835417 |
| B  | 4.336153342 | 10.001186512 | 13.514695292 |
| H  | 4.706514078 | 11.171901267 | 13.609764021 |
| B  | 3.163979619 | 7.630694130  | 14.677487902 |
| H  | 2.543817505 | 7.149699664  | 15.552089635 |
| B  | 4.840629366 | 7.399125228  | 12.373711021 |
| B  | 5.504889458 | 8.665767391  | 13.421244866 |
| H  | 6.718811813 | 8.917516787  | 13.454599174 |
| H  | 5.539616427 | 6.739806962  | 11.687741967 |
| F  | 0.999975748 | 7.879690472  | 13.176529147 |
| Mg | 6.235360254 | 10.536320395 | 12.463525169 |

Table S14: Cartesian coordinates of complex (**4b**)

|    |             |              |              |
|----|-------------|--------------|--------------|
| C  | 2.362315975 | 8.106409439  | 13.249781598 |
| B  | 4.800338419 | 7.205524681  | 14.153192717 |
| H  | 5.467911053 | 6.409397648  | 14.706160188 |
| B  | 3.257680155 | 7.937637133  | 11.812664713 |
| H  | 2.720645201 | 7.641704802  | 10.810757325 |
| B  | 2.884288074 | 9.352746470  | 14.288538732 |
| H  | 2.095811564 | 9.978551789  | 14.894654801 |
| B  | 3.397664828 | 6.755382759  | 13.154029754 |
| H  | 2.948504469 | 5.681480891  | 12.999450516 |
| B  | 2.942862676 | 9.536015220  | 12.523854841 |
| H  | 2.201631547 | 10.277008508 | 11.990572439 |
| B  | 4.575078883 | 9.128069687  | 11.964941354 |
| H  | 5.103691515 | 9.678255838  | 10.990472097 |
| B  | 4.473673886 | 8.825559115  | 14.854654101 |
| H  | 4.895400739 | 9.159224334  | 15.903565553 |
| B  | 4.338074683 | 10.005373389 | 13.512867165 |
| H  | 4.688644773 | 11.187148003 | 13.633003750 |
| B  | 3.166879171 | 7.634279088  | 14.675418175 |
| H  | 2.552739689 | 7.157664357  | 15.556252355 |
| B  | 4.843389099 | 7.403667521  | 12.371443504 |
| B  | 5.507288909 | 8.670394872  | 13.419102737 |
| H  | 6.741007758 | 8.906063445  | 13.466859380 |
| H  | 5.538085230 | 6.741062698  | 11.685453276 |
| F  | 1.002638515 | 7.882710880  | 13.174707290 |
| Zn | 6.186270467 | 10.474437946 | 12.492401338 |



Table S15: Cartesian coordinates of complex (**1c**)

|    |             |              |              |
|----|-------------|--------------|--------------|
| C  | 2.352311568 | 8.132107917  | 13.210259833 |
| B  | 4.792512079 | 7.252098274  | 14.128248365 |
| H  | 5.483283997 | 6.468839496  | 14.728574772 |
| B  | 3.256524679 | 7.967557669  | 11.778202613 |
| H  | 2.711058183 | 7.636750849  | 10.785082505 |
| B  | 2.859043773 | 9.384510870  | 14.249267280 |
| H  | 2.054765039 | 9.978634675  | 14.877452104 |
| B  | 3.398683104 | 6.789045699  | 13.122628806 |
| H  | 2.951869170 | 5.702920706  | 13.005509354 |
| B  | 2.925476940 | 9.564801424  | 12.484554956 |
| H  | 2.151837081 | 10.283539903 | 11.955074994 |
| B  | 4.563754261 | 9.168562565  | 11.935031647 |
| H  | 5.067750558 | 9.680316373  | 10.995985880 |
| B  | 4.449499723 | 8.870886075  | 14.824766914 |
| H  | 4.902003657 | 9.162470620  | 15.903550334 |
| B  | 4.311747876 | 10.046991498 | 13.479946715 |
| H  | 4.627509637 | 11.178653125 | 13.625705806 |
| B  | 3.153022304 | 7.669064281  | 14.641036373 |
| H  | 2.540679205 | 7.165985225  | 15.517793597 |
| B  | 4.843395580 | 7.447107677  | 12.346359940 |
| B  | 5.491842858 | 8.721028898  | 13.394974193 |
| H  | 6.680836319 | 8.916044547  | 13.502526218 |
| H  | 5.552738479 | 6.761523005  | 11.689777148 |
| C  | 0.839121772 | 7.853035150  | 13.147211919 |
| H  | 0.481169377 | 7.966121720  | 12.125320774 |
| H  | 0.627880417 | 6.838108322  | 13.479212082 |
| H  | 0.298637555 | 8.549490488  | 13.785000769 |
| Li | 6.479691247 | 8.117534824  | 15.234153930 |

Table S16: Cartesian coordinates of complex (**2c**)

|    |             |              |              |
|----|-------------|--------------|--------------|
| C  | 2.357539980 | 8.133122275  | 13.227743523 |
| B  | 4.783579833 | 7.273004963  | 14.102553561 |
| H  | 5.459252978 | 6.476954483  | 14.713229760 |
| B  | 3.283327926 | 7.965344267  | 11.792622563 |
| H  | 2.737373343 | 7.643298589  | 10.795062537 |
| B  | 2.875948002 | 9.398137095  | 14.262500129 |
| H  | 2.087966643 | 10.008440729 | 14.897211160 |
| B  | 3.418598921 | 6.796294856  | 13.117753188 |
| H  | 2.978124745 | 5.705444655  | 13.003757002 |
| B  | 2.939104551 | 9.563725054  | 12.496734578 |
| H  | 2.163541101 | 10.276767471 | 11.956220523 |
| B  | 4.575014967 | 9.161127557  | 11.949845976 |
| H  | 5.057209864 | 9.680794599  | 10.997783929 |
| B  | 4.450482129 | 8.869181203  | 14.801614346 |
| H  | 4.894504020 | 9.160991813  | 15.888074216 |
| B  | 4.324547460 | 10.046620407 | 13.480346707 |
| H  | 4.635435321 | 11.183726758 | 13.624927425 |
| B  | 3.156662842 | 7.678996875  | 14.650426324 |
| H  | 2.558383468 | 7.166175936  | 15.534374680 |
| B  | 4.873882334 | 7.441847189  | 12.339245904 |
| B  | 5.500197184 | 8.727920545  | 13.380143185 |
| H  | 6.690283515 | 8.929689484  | 13.489832459 |
| H  | 5.570561667 | 6.742561263  | 11.677803251 |
| C  | 0.856905601 | 7.853929425  | 13.143976355 |
| H  | 0.395242815 | 7.987494088  | 11.896876139 |
| H  | 0.562019852 | 6.610505424  | 13.543692415 |
| H  | 0.151372164 | 8.689009152  | 13.915122468 |
| Na | 6.511583210 | 8.102625724  | 15.273735516 |

Table S17: Cartesian coordinates of complex (**3c**)

|    |             |              |              |
|----|-------------|--------------|--------------|
| C  | 2.342943335 | 8.131893504  | 13.205858232 |
| B  | 4.784587960 | 7.252391800  | 14.120487456 |
| H  | 5.500992308 | 6.461217879  | 14.738307093 |
| B  | 3.245203127 | 7.967482714  | 11.772553526 |
| H  | 2.716893944 | 7.629897068  | 10.777778533 |
| B  | 2.850867453 | 9.384425242  | 14.244128188 |
| H  | 2.068629949 | 9.981259404  | 14.889433291 |
| B  | 3.389458076 | 6.789035867  | 13.116813475 |
| H  | 2.965815625 | 5.696829421  | 13.012529753 |
| B  | 2.914818808 | 9.564680384  | 12.479320564 |
| H  | 2.154270299 | 10.295479720 | 11.957561713 |
| B  | 4.552411213 | 9.168750464  | 11.927537729 |
| H  | 5.074570417 | 9.677960545  | 11.002373734 |
| B  | 4.442221154 | 8.871130854  | 14.817436697 |
| H  | 4.918011805 | 9.164635110  | 15.917966179 |
| B  | 4.302372713 | 10.047172024 | 13.472776695 |
| H  | 4.633295766 | 11.169289043 | 13.629880162 |
| B  | 3.145728092 | 7.669047609  | 14.635536133 |
| H  | 2.561825307 | 7.166030937  | 15.526382081 |
| B  | 4.832962959 | 7.447362245  | 12.338524893 |
| B  | 5.482611097 | 8.721440544  | 13.386204625 |
| H  | 6.705063019 | 8.920846306  | 13.499116590 |
| H  | 5.553061995 | 6.764632210  | 11.697423453 |
| C  | 0.829722841 | 7.852519710  | 13.144915428 |
| H  | 0.477258515 | 7.968491556  | 12.122015145 |
| H  | 0.617763381 | 6.837379804  | 13.473225475 |
| H  | 0.289816517 | 8.549457695  | 13.781422675 |
| Mg | 6.495468763 | 8.122992220  | 15.265700307 |

Table S18: Cartesian coordinates of complex (**4c**)

|    |             |              |              |
|----|-------------|--------------|--------------|
| C  | 2.301347420 | 8.122508112  | 13.226865474 |
| B  | 4.762784898 | 7.244436483  | 14.100845062 |
| H  | 5.398494998 | 6.409033966  | 14.673718746 |
| B  | 3.265718800 | 7.959760245  | 11.799737907 |
| H  | 2.737982225 | 7.619279515  | 10.803354528 |
| B  | 2.830774120 | 9.375291211  | 14.247261949 |
| H  | 2.029722968 | 9.979206418  | 14.863793581 |
| B  | 3.367854886 | 6.805108640  | 13.119551758 |
| H  | 2.921286174 | 5.722373453  | 12.999474755 |
| B  | 2.924333493 | 9.559282209  | 12.500842280 |
| H  | 2.169095943 | 10.295000176 | 11.976420897 |
| B  | 4.527794675 | 9.161613740  | 11.924864306 |
| H  | 5.030898966 | 9.676497146  | 10.993132903 |
| B  | 4.420620615 | 8.882130173  | 14.818012025 |
| H  | 4.813607400 | 9.207551262  | 15.899525222 |
| B  | 4.315152221 | 10.040952750 | 13.499995591 |
| H  | 4.623914842 | 11.172127893 | 13.624990998 |
| B  | 3.144606784 | 7.678050003  | 14.648278010 |
| H  | 2.546707573 | 7.166982012  | 15.525318489 |
| B  | 4.866012719 | 7.427537582  | 12.355882589 |
| B  | 5.488201490 | 8.733486937  | 13.359460805 |
| H  | 6.660920762 | 8.984917622  | 13.348358332 |
| H  | 5.555601918 | 6.744075305  | 11.686664707 |
| C  | 0.813033319 | 7.855256752  | 13.121472229 |
| H  | 0.465537801 | 7.980843558  | 12.095874488 |
| H  | 0.572520915 | 6.838104681  | 13.430262458 |
| H  | 0.242164671 | 8.538372081  | 13.750141809 |
| Zn | 7.051953823 | 8.093951940  | 15.559107908 |

Table S19: Cartesian coordinates of complex (**1d**)

|    |             |              |              |
|----|-------------|--------------|--------------|
| C  | 2.353335725 | 8.132352675  | 13.230757300 |
| B  | 4.779529994 | 7.262150601  | 14.111006892 |
| H  | 5.462079999 | 6.453949389  | 14.715649193 |
| B  | 3.292659723 | 7.964217403  | 11.800244745 |
| H  | 2.742580934 | 7.647529735  | 10.810886930 |
| B  | 2.883987716 | 9.398523162  | 14.269453134 |
| H  | 2.084393624 | 10.001693623 | 14.884237015 |
| B  | 3.423968056 | 6.796013078  | 13.124090273 |
| H  | 2.970590742 | 5.718195166  | 13.000407854 |
| B  | 2.945523248 | 9.561943107  | 12.504971396 |
| H  | 2.171886074 | 10.266317314 | 11.967029350 |
| B  | 4.582169327 | 9.162888702  | 11.950383951 |
| H  | 5.063029465 | 9.678619194  | 11.006635864 |
| B  | 4.446343416 | 8.868707681  | 14.814726360 |
| H  | 4.895819914 | 9.170490444  | 15.906112673 |
| B  | 4.333241487 | 10.045887432 | 13.490555387 |
| H  | 4.653903927 | 11.173692527 | 13.627849146 |
| B  | 3.163331832 | 7.680576040  | 14.654305255 |
| H  | 2.552620260 | 7.171013279  | 15.523360050 |
| B  | 4.883409308 | 7.437407149  | 12.349874998 |
| B  | 5.497632415 | 8.727627053  | 13.378337592 |
| H  | 6.707538394 | 8.930832515  | 13.493281310 |
| H  | 5.585045188 | 6.751266643  | 11.693584406 |
| C  | 0.887764489 | 7.859430739  | 13.144099578 |
| F  | 0.374967833 | 7.981641904  | 11.900420338 |
| F  | 0.540727573 | 6.610821581  | 13.539673120 |
| F  | 0.127439350 | 8.677389617  | 13.908918543 |
| Li | 6.443126414 | 8.142554114  | 15.152357152 |

Table S20: Cartesian coordinates of complex (**2d**)

|    |             |              |              |
|----|-------------|--------------|--------------|
| C  | 2.344082370 | 8.133773564  | 13.222975680 |
| B  | 4.776240370 | 7.265608540  | 14.108234180 |
| H  | 5.462119387 | 6.458242405  | 14.713942551 |
| B  | 3.282529901 | 7.965665008  | 11.793175409 |
| H  | 2.733399429 | 7.646842096  | 10.803588541 |
| B  | 2.877544737 | 9.397935680  | 14.262266257 |
| H  | 2.079691151 | 10.002187015 | 14.879594075 |
| B  | 3.416773396 | 6.799339179  | 13.118625054 |
| H  | 2.966114985 | 5.719451906  | 12.996191877 |
| B  | 2.935455081 | 9.562599201  | 12.497589621 |
| H  | 2.162057856 | 10.268889085 | 11.961146003 |
| B  | 4.571998864 | 9.162658432  | 11.946264826 |
| H  | 5.057040770 | 9.678799819  | 11.003605860 |
| B  | 4.444030805 | 8.867617638  | 14.809971337 |
| H  | 4.896915756 | 9.169312469  | 15.902005462 |
| B  | 4.323579151 | 10.045099531 | 13.483384865 |
| H  | 4.647849233 | 11.173496944 | 13.623390640 |
| B  | 3.155033699 | 7.682433798  | 14.646261266 |
| H  | 2.547706682 | 7.172092806  | 15.518744601 |
| B  | 4.873146009 | 7.439922089  | 12.344129380 |
| B  | 5.493150791 | 8.727426034  | 13.377110021 |
| H  | 6.701730368 | 8.930376291  | 13.492505127 |
| H  | 5.578910664 | 6.752734994  | 11.689967492 |
| C  | 0.878711595 | 7.859918047  | 13.138677793 |
| F  | 0.362843356 | 7.980388392  | 11.896129774 |
| F  | 0.531908888 | 6.611615515  | 13.535715973 |
| F  | 0.118080154 | 8.677474975  | 13.903713821 |
| Na | 6.630000976 | 8.121830413  | 15.284302319 |

Table S21: Cartesian coordinates of complex (**3d**)

|    |             |              |              |
|----|-------------|--------------|--------------|
| C  | 2.340332641 | 8.133774470  | 13.222367386 |
| B  | 4.777774378 | 7.261624670  | 14.107802691 |
| H  | 5.401539745 | 6.387843969  | 14.677074029 |
| B  | 3.280848308 | 7.965550157  | 11.790042698 |
| H  | 2.739882849 | 7.640192239  | 10.799644717 |
| B  | 2.866991151 | 9.393906504  | 14.256109976 |
| H  | 2.072975090 | 9.996863610  | 14.876817383 |
| B  | 3.404308044 | 6.803067189  | 13.114565168 |
| H  | 2.957089997 | 5.723023365  | 12.995529721 |
| B  | 2.932688179 | 9.564838537  | 12.495975675 |
| H  | 2.163973443 | 10.278199358 | 11.965154473 |
| B  | 4.558067873 | 9.164052779  | 11.938977755 |
| H  | 5.050771708 | 9.679512103  | 11.002452459 |
| B  | 4.444463862 | 8.870066979  | 14.812992086 |
| H  | 4.813404997 | 9.216401719  | 15.917708706 |
| B  | 4.325186931 | 10.044020521 | 13.489204482 |
| H  | 4.645023056 | 11.172637530 | 13.625831444 |
| B  | 3.157824067 | 7.681517059  | 14.649024717 |
| H  | 2.551073748 | 7.171211069  | 15.520096303 |
| B  | 4.875251634 | 7.437987846  | 12.348716177 |
| B  | 5.494973009 | 8.728362620  | 13.376304280 |
| H  | 6.688054715 | 8.981196231  | 13.370740378 |
| H  | 5.576187920 | 6.752008491  | 11.690585168 |
| C  | 0.873331842 | 7.860064220  | 13.136004665 |
| F  | 0.367171483 | 7.973924636  | 11.889688402 |
| F  | 0.527323803 | 6.615635673  | 13.539487613 |
| F  | 0.113672544 | 8.684366312  | 13.891744894 |
| Mg | 6.848459406 | 8.091882010  | 15.452566358 |

Table S22: Cartesian coordinates of complex (**4d**)

|    |             |              |              |
|----|-------------|--------------|--------------|
| C  | 2.340332641 | 8.133774470  | 13.222367386 |
| B  | 4.777774378 | 7.261624670  | 14.107802691 |
| H  | 5.401539745 | 6.387843969  | 14.677074029 |
| B  | 3.280848308 | 7.965550157  | 11.790042698 |
| H  | 2.739882849 | 7.640192239  | 10.799644717 |
| B  | 2.866991151 | 9.393906504  | 14.256109976 |
| H  | 2.072975090 | 9.996863610  | 14.876817383 |
| B  | 3.404308044 | 6.803067189  | 13.114565168 |
| H  | 2.957089997 | 5.723023365  | 12.995529721 |
| B  | 2.932688179 | 9.564838537  | 12.495975675 |
| H  | 2.163973443 | 10.278199358 | 11.965154473 |
| B  | 4.558067873 | 9.164052779  | 11.938977755 |
| H  | 5.050771708 | 9.679512103  | 11.002452459 |
| B  | 4.444463862 | 8.870066979  | 14.812992086 |
| H  | 4.813404997 | 9.216401719  | 15.917708706 |
| B  | 4.325186931 | 10.044020521 | 13.489204482 |
| H  | 4.645023056 | 11.172637530 | 13.625831444 |
| B  | 3.157824067 | 7.681517059  | 14.649024717 |
| H  | 2.551073748 | 7.171211069  | 15.520096303 |
| B  | 4.875251634 | 7.437987846  | 12.348716177 |
| B  | 5.494973009 | 8.728362620  | 13.376304280 |
| H  | 6.688054715 | 8.981196231  | 13.370740378 |
| H  | 5.576187920 | 6.752008491  | 11.690585168 |
| C  | 0.873331842 | 7.860064220  | 13.136004665 |
| F  | 0.367171483 | 7.973924636  | 11.889688402 |
| F  | 0.527323803 | 6.615635673  | 13.539487613 |
| F  | 0.113672544 | 8.684366312  | 13.891744894 |
| Mg | 6.848459406 | 8.091882010  | 15.452566358 |
